# Supplementary material
Source: publisher figshare collection journal article supplement (https://sage.figshare.com/ndownloader/files/16923893)
Supplement: Supplementary file 1 [file 16923893]

Web Appendix: Federal and State Cannabis Legislation and Policy

|                | Recreational     | Medicinal       |                  | Name of Legislation (Year)                                                                                                                                                       | Packaging and Labeling Policy                                                                                                                                                            | Retail & Distribution Policy | Advertising Policy                                                                                                                                                                                                                                                                                                                                                                                                                                                                                                                                                                                                                                                                                                                                                                                                                                                                                             | Promotion Policy                                                                                                                                                                                                                                                                                                                                                                                                  | Usage Policy                                                                                                                                                                                                   |  |
|----------------|------------------|-----------------|------------------|----------------------------------------------------------------------------------------------------------------------------------------------------------------------------------|------------------------------------------------------------------------------------------------------------------------------------------------------------------------------------------|------------------------------|----------------------------------------------------------------------------------------------------------------------------------------------------------------------------------------------------------------------------------------------------------------------------------------------------------------------------------------------------------------------------------------------------------------------------------------------------------------------------------------------------------------------------------------------------------------------------------------------------------------------------------------------------------------------------------------------------------------------------------------------------------------------------------------------------------------------------------------------------------------------------------------------------------------|-------------------------------------------------------------------------------------------------------------------------------------------------------------------------------------------------------------------------------------------------------------------------------------------------------------------------------------------------------------------------------------------------------------------|----------------------------------------------------------------------------------------------------------------------------------------------------------------------------------------------------------------|--|
|                | Legal/Prohibited | General Access* | Limited Access** |                                                                                                                                                                                  |                                                                                                                                                                                          |                              |                                                                                                                                                                                                                                                                                                                                                                                                                                                                                                                                                                                                                                                                                                                                                                                                                                                                                                                |                                                                                                                                                                                                                                                                                                                                                                                                                   |                                                                                                                                                                                                                |  |
| <b>Federal</b> | Prohibited       | Prohibited      |                  | Marihuana Tax Act (1937); Comprehensive Drug Abuse Prevention and Control Act of 1970 (Controlled Substances Act; Schedule 1 Substance)                                          |                                                                                                                                                                                          |                              |                                                                                                                                                                                                                                                                                                                                                                                                                                                                                                                                                                                                                                                                                                                                                                                                                                                                                                                |                                                                                                                                                                                                                                                                                                                                                                                                                   |                                                                                                                                                                                                                |  |
| <b>State:</b>  |                  |                 |                  |                                                                                                                                                                                  |                                                                                                                                                                                          |                              |                                                                                                                                                                                                                                                                                                                                                                                                                                                                                                                                                                                                                                                                                                                                                                                                                                                                                                                |                                                                                                                                                                                                                                                                                                                                                                                                                   |                                                                                                                                                                                                                |  |
| <b>Alaska</b>  | Legal            | ✓               |                  | Measure 8 (1998); SB 94 (1999); Statute Title 17, Chapter 37; Ballot Measure 2 (2014); 3AAC 306.345 Packaging and Labeling; 3AAC 306.360 Restriction on Advertising of Marijuana | <b>Label:</b> retail store name and license number, THC/CBD%, warning statement of: intoxicating effects, health risks, 21+ use<br><b>Packaging:</b> opaque, resealable, child-resistant |                              | <b>General advertising:</b> an advertisement for marijuana or a marijuana product may not contain a statement or illustration that is: 1) false or misleading; 2) promotes excessive consumption; 3) represents that the use of marijuana has curative or therapeutic effects; 4) depicts a person under 21 years of age consuming marijuana; or 5) includes an object or character, including a toy, a cartoon character, or any other depiction designed to appeal to a person under 21 years of age, that promotes consumption of marijuana; all advertising must contain the following warnings: 1) “Marijuana has intoxicating effects and may be habit forming and addictive.”; 2) “Marijuana impairs concentration, coordination, and judgment. Do not operate a vehicle or machinery under its influence.”; 3) “There are health risks associated with consumption of marijuana.”; 4) “For use only by | <b>Window display:</b> a sign may be placed in the retail marijuana store’s window or attached to the outside of the licensed premises; the size of each sign may not exceed 4,800 square inches<br><b>Promotion:</b> A retail marijuana store may not use giveaway coupons as promotional materials, or conduct promotional activities such as games or competitions to encourage the sale of marijuana products | <b>Use:</b> no impaired motor vehicle operation (no formal limit, based on observed impairment), no public consumption, 21+<br><b>Purchase limit:</b> 28.5 g of non-concentrate (flower)/transaction, 6 plants |  |

|            |       |   |                                                                                                                                                                                                                                              |                                                                                                                                                                                                                                                                                                                                                                                                                  |                                                                                                                                                                                                                                                                                                                                |                                                                                                                                                                                                                                                                                                                                                                                                                                                                                                                                                                                                 |                                                                                                                                                                                                                                                                                                                                                                                                                                                                                                                                                                                                                                                                                                                                                                                                                                                                                                                                                                                                                       |                                                                                                                                                                                                                                                                                                                        |  |
|------------|-------|---|----------------------------------------------------------------------------------------------------------------------------------------------------------------------------------------------------------------------------------------------|------------------------------------------------------------------------------------------------------------------------------------------------------------------------------------------------------------------------------------------------------------------------------------------------------------------------------------------------------------------------------------------------------------------|--------------------------------------------------------------------------------------------------------------------------------------------------------------------------------------------------------------------------------------------------------------------------------------------------------------------------------|-------------------------------------------------------------------------------------------------------------------------------------------------------------------------------------------------------------------------------------------------------------------------------------------------------------------------------------------------------------------------------------------------------------------------------------------------------------------------------------------------------------------------------------------------------------------------------------------------|-----------------------------------------------------------------------------------------------------------------------------------------------------------------------------------------------------------------------------------------------------------------------------------------------------------------------------------------------------------------------------------------------------------------------------------------------------------------------------------------------------------------------------------------------------------------------------------------------------------------------------------------------------------------------------------------------------------------------------------------------------------------------------------------------------------------------------------------------------------------------------------------------------------------------------------------------------------------------------------------------------------------------|------------------------------------------------------------------------------------------------------------------------------------------------------------------------------------------------------------------------------------------------------------------------------------------------------------------------|--|
|            |       |   |                                                                                                                                                                                                                                              |                                                                                                                                                                                                                                                                                                                                                                                                                  |                                                                                                                                                                                                                                                                                                                                |                                                                                                                                                                                                                                                                                                                                                                                                                                                                                                                                                                                                 | <p>adults twenty-one and older. Keep out of the reach of children.”; and 5) “Marijuana should not be used by women who are pregnant or breast feeding.”</p> <p><b>Outdoor advertising:</b> a retail marijuana store may have not more than three signs, visible to the general public from the public right-of way, that identify the retail marijuana store by its business name; a retail marijuana store may not place an advertisement for marijuana or a marijuana product: 1) within 1,000 feet of the perimeter of any child-centered facility, including a school, a child care facility or other facility providing services to children, a playground or recreation center, a public park, a library, or a game arcade that is open to persons under 21 years of age; 2) on or in a public transit vehicle or public transit shelter; 3) on or in a publicly owned or operated property; 4) within 1,000 feet of a substance abuse or treatment facility; or 5) on a campus for postsecondary education</p> |                                                                                                                                                                                                                                                                                                                        |  |
| California | Legal | ✓ | <p>Proposition 215 (1996); SB 420 (2003); Subchapter 5 Labeling and Packaging; Proposition 64 (2016), Chapter 15 Advertising and Marketing Restrictions; Emergency Rulemaking Action: Medicinal and Adult-Use Cannabis Regulation (2017)</p> | <p><b>Label:</b> English language, unobstructed and conspicuous, amount/quantity, no cartoons, children’s characters, imitation candy, THC/CBD%, THC/CBD per serving, manufacturer name and contact information, date of manufacture, warning statement of: keep away from children, impairment, cannabis product symbol, at least 6-point font</p> <p><b>Packaging:</b> protect from contamination, tamper-</p> | <p><b>Product:</b> extensive testing for contaminants, THC/CBD%, moisture, pesticides, no human, animal, insect, or fruit shapes for edibles</p> <p><b>Operations:</b> 6 am-10 pm; deliveries by licensed retailer in enclosed vehicle; extensive testing for potency and contaminants, at least 600 ft. from K-12 schools</p> | <p><b>General advertising:</b> 1) all advertisements and marketing shall accurately and legibly identify the licensee responsible for its content; 2) any advertising or marketing placed in broadcast, cable, radio, print and digital communications shall only be displayed where at least 71.6% of the audience is reasonably expected to be 21 years of age or older, as determined by reliable, up-to-date audience composition data; 3) any advertising or marketing involving direct, individualized communication or dialogue controlled by the licensee shall utilize a method of</p> | <p><b>Giveaway:</b> no gift or product giveaways for recreational use, some for medical</p> <p><b>Display:</b> cannabis window displays not allowed, interior displays must not be visible from outside</p>                                                                                                                                                                                                                                                                                                                                                                                                                                                                                                                                                                                                                                                                                                                                                                                                           | <p><b>Use:</b> no impaired motor vehicle operation (no formal THC limit, based on observed impairment), no public consumption, 21+</p> <p><b>Serving/dose, edible:</b> 10 mg individual, 100 mg package limit</p> <p><b>Purchase limit:</b> 28.5 g of non-concentrate (flower), 8 g concentrate, 6 immature plants</p> |  |

|  |  |  |  |  |                                                                  |  |                                                                                                                                                                                                                                                                                                                                                                                                                                                                                                                                                                                                                                                                                                                                                                                                                                                                                                                                                                                                                                                                                                                                                                                                                                                                                                                                                                                                                                                                                                                                                                  |  |  |
|--|--|--|--|--|------------------------------------------------------------------|--|------------------------------------------------------------------------------------------------------------------------------------------------------------------------------------------------------------------------------------------------------------------------------------------------------------------------------------------------------------------------------------------------------------------------------------------------------------------------------------------------------------------------------------------------------------------------------------------------------------------------------------------------------------------------------------------------------------------------------------------------------------------------------------------------------------------------------------------------------------------------------------------------------------------------------------------------------------------------------------------------------------------------------------------------------------------------------------------------------------------------------------------------------------------------------------------------------------------------------------------------------------------------------------------------------------------------------------------------------------------------------------------------------------------------------------------------------------------------------------------------------------------------------------------------------------------|--|--|
|  |  |  |  |  | evident, child resistant, opaque, resealable (multiple servings) |  | age affirmation to verify that the recipient is 21 years of age or older prior to engaging in such communication or dialogue controlled by the licensee; such method of age affirmation may include user confirmation, birth date disclosure, or other similar registration method; 4) all advertising shall be truthful and appropriately substantiated. No licensee shall: a) advertise or market in a manner that is false or untrue in any material particular, or that, irrespective of falsity, directly, or by ambiguity, omission, or inference, or by the addition of irrelevant, scientific or technical matter tends to create a misleading impression; b) publish or disseminate advertising or marketing containing any statement concerning a brand or product that is inconsistent with any statement on the labeling thereof; c) publish or disseminate advertising or marketing containing any statement, design, device, or representation which tends to create the impression that the marijuana originated in a particular place or region, unless the label of the advertised product bears an appellation of origin, and such appellation of origin appears in the advertisement; d) advertise or market on a billboard or similar advertising device located on an Interstate Highway or State Highway which crosses the border of any other state; e) advertise or market marijuana or marijuana products in a manner intended to encourage persons under the age of 21 years to consume marijuana or marijuana products; f) publish or |  |  |
|--|--|--|--|--|------------------------------------------------------------------|--|------------------------------------------------------------------------------------------------------------------------------------------------------------------------------------------------------------------------------------------------------------------------------------------------------------------------------------------------------------------------------------------------------------------------------------------------------------------------------------------------------------------------------------------------------------------------------------------------------------------------------------------------------------------------------------------------------------------------------------------------------------------------------------------------------------------------------------------------------------------------------------------------------------------------------------------------------------------------------------------------------------------------------------------------------------------------------------------------------------------------------------------------------------------------------------------------------------------------------------------------------------------------------------------------------------------------------------------------------------------------------------------------------------------------------------------------------------------------------------------------------------------------------------------------------------------|--|--|

|                 |       |   |  |                                                                         |                                                                                                                                                                                                                                                                                                                           |                                                                                    |                                                                                                                                                                                                                                                                                                                                                                                                                                                                                                                                                                                                                                                                                                                                                                                                                                                                                                                                                                                                                                                  |                                                                                                                                                                                                                                                                                                                                                                                                                                |                                                                                                                                                                                      |
|-----------------|-------|---|--|-------------------------------------------------------------------------|---------------------------------------------------------------------------------------------------------------------------------------------------------------------------------------------------------------------------------------------------------------------------------------------------------------------------|------------------------------------------------------------------------------------|--------------------------------------------------------------------------------------------------------------------------------------------------------------------------------------------------------------------------------------------------------------------------------------------------------------------------------------------------------------------------------------------------------------------------------------------------------------------------------------------------------------------------------------------------------------------------------------------------------------------------------------------------------------------------------------------------------------------------------------------------------------------------------------------------------------------------------------------------------------------------------------------------------------------------------------------------------------------------------------------------------------------------------------------------|--------------------------------------------------------------------------------------------------------------------------------------------------------------------------------------------------------------------------------------------------------------------------------------------------------------------------------------------------------------------------------------------------------------------------------|--------------------------------------------------------------------------------------------------------------------------------------------------------------------------------------|
|                 |       |   |  |                                                                         |                                                                                                                                                                                                                                                                                                                           |                                                                                    | disseminate advertising or marketing containing symbols, language, music, gestures, cartoon characters or other content elements known to appeal primarily to persons below the legal age of consumption; or 8) advertise or market marijuana or marijuana products on an advertising sign within 1,000 feet of a day care center, school providing instruction in kindergarten or any grades 1 through 12, playground, or youth center<br><b>Outdoor advertising:</b> prohibited within 700 feet of playgrounds, youth centers, and schools                                                                                                                                                                                                                                                                                                                                                                                                                                                                                                     |                                                                                                                                                                                                                                                                                                                                                                                                                                |                                                                                                                                                                                      |
| <b>Colorado</b> | Legal | ✓ |  | Amendment 20 (2000); Amendment 64 (2012); M 1002 Labeling and Packaging | <b>Label:</b> English language, unobstructed and conspicuous, no false or misleading health claims, store license number, date of sale, manufacturer name, amount/quantity, contaminants found during testing, THC%, nutrition panel (when necessary), warning statement of: health risks, pregnant use, universal symbol | <b>Product:</b> extensive testing for contaminants, THC/CBD%, moisture, pesticides | <b>General advertising:</b> a retail marijuana establishment shall not engage in advertising that is deceptive, false, or misleading; a retail marijuana establishment shall not make any deceptive, false, or misleading assertions or statements on any product, any sign, or any document provided to a consumer; a retail marijuana establishment shall not engage in Advertising that specifically targets Persons located outside the state of Colorado; a retail marijuana establishment may advertise that its products have been tested by a retail marijuana testing facility, but shall not engage in advertising or utilize signage that asserts its products are safe because they are tested by a retail marijuana testing facility<br><b>Television, radio, print, internet advertising:</b> a retail marijuana establishment shall not utilize television, radio, print, or internet advertising unless the retail marijuana establishment has reliable evidence that no more than 30 percent of the audience for the program on | <b>Event sponsorship:</b> may sponsor a charitable, sports, or similar event, but a retail marijuana establishment shall not engage in advertising at, or in connection with, such an event unless the retail marijuana establishment has reliable evidence that no more than 30 percent of the audience at the event and/or viewing advertising in connection with the event is reasonably expected to be under the age of 21 | <b>Use:</b> no impaired motor vehicle operation (5 ng THC limit), no public consumption, 21+<br><b>Purchase limit:</b> 28.5 g of non-concentrate (flower), 8 g concentrate, 6 plants |

|                             |       |   |  |                                                                                                                                                                                  |                                                                                                                                                                                                                                                                                                                                                                                         |  |                                                                                                                                                                                                                                                                                                                                                                                                                                                                                                                                                                                                                                                            |  |                                                                                                                                                                                                                                                                                   |
|-----------------------------|-------|---|--|----------------------------------------------------------------------------------------------------------------------------------------------------------------------------------|-----------------------------------------------------------------------------------------------------------------------------------------------------------------------------------------------------------------------------------------------------------------------------------------------------------------------------------------------------------------------------------------|--|------------------------------------------------------------------------------------------------------------------------------------------------------------------------------------------------------------------------------------------------------------------------------------------------------------------------------------------------------------------------------------------------------------------------------------------------------------------------------------------------------------------------------------------------------------------------------------------------------------------------------------------------------------|--|-----------------------------------------------------------------------------------------------------------------------------------------------------------------------------------------------------------------------------------------------------------------------------------|
|                             |       |   |  |                                                                                                                                                                                  |                                                                                                                                                                                                                                                                                                                                                                                         |  | which the advertising is to be seen is reasonably expected to be under the age of 21<br><b>Outdoor advertising:</b> outdoor advertising is generally prohibited, except as otherwise provided; it shall be unlawful for any retail marijuana establishment to engage in advertising that is visible to members of the public from any street, sidewalk, park or other public place or target individuals under 21                                                                                                                                                                                                                                          |  |                                                                                                                                                                                                                                                                                   |
| <b>District of Columbia</b> | Legal | ✓ |  | Initiative 59 (1998); L18-0210 (2010); Initiative 71 (2014); District of Columbia Municipal Regulations for the Medical Marijuana Program                                        | <b>Label:</b> legible, firmly affixed, name of cultivator, name of dispensary, amount/quantity, THC/CBD%, name of physician, dispensing date, patient name and registration number, statement for medical use                                                                                                                                                                           |  | <b>Advertising:</b> 1) advertisements relating to the prices of medical marijuana shall not be displayed in the window of a registered establishment; 2) advertisements relating to medical marijuana shall not be displayed on the exterior of any window or on the exterior or interior of any door; 3) no sign advertising medical marijuana on the exterior or visible from the exterior of any registered establishment or elsewhere in the District shall be illuminated at any time                                                                                                                                                                 |  | <b>Use:</b> no impaired motor vehicle operation (no formal THC limit, based on existing DUI laws), no public consumption, 21+<br><b>Purchase limit:</b> 2 oz. non-concentrate (flower)/month for medical, no recreational sales, 6 plants for recreation                          |
| <b>Maine</b>                | Legal | ✓ |  | Question 2 (1999); LD 611 (2002); Question 5 (2009); LD 1811 (2010); LD 1296 (2011); Question 1 (2016); 22 MRSA 2157; Rules Governing the Maine Medical Use of Marijuana Program | <b>Label:</b> license number of cultivation facility, manufacturing facility, and retail store, universal cannabis symbol, warning statement, batch number, THC/CBD%, dosage information, no trademarks, no appeals to persons under 21, no false or deceptive labeling<br><b>Packaging:</b> child-resistant, tamper-evident, measurement component for liquids and child-resistant cap |  | <b>General advertising:</b> rules adopted by the department must prohibit the use of misleading, deceptive, or false advertising, marketing and signage and the use of mass-marketing advertisements or marketing campaigns that have a likelihood of reaching persons under 21 years of age or that are designed to appeal to persons under 21 years of age, and may include, but are not limited to: 1) prohibition on health or physical benefit claims in advertising, marketing and packaging; 2) prohibition on unsolicited advertising or marketing on the internet, including but not limited to banner advertisements on mass-market websites; 3) |  | <b>Use:</b> no impaired motor vehicle operation (no formal THC limit, considering 5 ng), no public consumption, 21+<br><b>Purchase limit:</b> 2.5 oz. non-concentrate (flower)/transaction for medical and recreational (no current recreational sales), 12 plants for recreation |

|               |       |   |                                                                                                                                  |                                                                                                                                                                                                                                                                                                                                                                                                                                                                                                                                    |  |                                                                                                                                                                                                                                                                                                                                                                                                                                                                                                                                                                                                                                                                                                                                                                                                                                                                                                                                                                                                               |                                                                                                                                                                                                                                                                                                                                                                                                                                                                                                                                  |                                                                                                                                                                                                                                                             |  |
|---------------|-------|---|----------------------------------------------------------------------------------------------------------------------------------|------------------------------------------------------------------------------------------------------------------------------------------------------------------------------------------------------------------------------------------------------------------------------------------------------------------------------------------------------------------------------------------------------------------------------------------------------------------------------------------------------------------------------------|--|---------------------------------------------------------------------------------------------------------------------------------------------------------------------------------------------------------------------------------------------------------------------------------------------------------------------------------------------------------------------------------------------------------------------------------------------------------------------------------------------------------------------------------------------------------------------------------------------------------------------------------------------------------------------------------------------------------------------------------------------------------------------------------------------------------------------------------------------------------------------------------------------------------------------------------------------------------------------------------------------------------------|----------------------------------------------------------------------------------------------------------------------------------------------------------------------------------------------------------------------------------------------------------------------------------------------------------------------------------------------------------------------------------------------------------------------------------------------------------------------------------------------------------------------------------|-------------------------------------------------------------------------------------------------------------------------------------------------------------------------------------------------------------------------------------------------------------|--|
|               |       |   |                                                                                                                                  |                                                                                                                                                                                                                                                                                                                                                                                                                                                                                                                                    |  |                                                                                                                                                                                                                                                                                                                                                                                                                                                                                                                                                                                                                                                                                                                                                                                                                                                                                                                                                                                                               | prohibition on opt-in advertising or marketing that does not permit an easy and permanent opt-out feature; 4) prohibition on advertising or marketing directed toward location-based devices including but not limited to cellular phones, unless the marketing is a mobile device application installed on the device by the owner of the device who is 21 years of age or older and includes an easy and permanent opt-out feature; 5) prohibition on signage that is inconsistent with local ordinances, laws and regulations |                                                                                                                                                                                                                                                             |  |
| Massachusetts | Legal | ✓ | Question 3 (2012); Regulations (2013); Question 4 (2016); Implementation of an Act for the Humanitarian Medical Use of Marijuana | <p><b>Label:</b> font larger than 1/16", patient's name, name and registration number of producer, date of packaging, amount/quantity, batch and serial number, barcode, THC/CBD%, testing statement, directions (if relevant), warning statement of: no approval by FDA, contaminant testing results/date, keep away from children</p> <p><b>Packaging:</b> plain, opaque, tamper-proof, child-proof containers without product, cartoons; legible, firmly affixed label; Product: edibles must not resemble commercial candy</p> |  | <p><b>General advertising:</b> a Registered Marijuana Dispensary (RMD): 1) may develop a logo to be used in labeling, signage, and other materials. The use of medical symbols, images of marijuana, related paraphernalia, and colloquial references to cannabis and marijuana are prohibited from use in this logo. (2) external signage shall not be illuminated except for a period of 30 minutes before sundown until closing, and shall comply with local requirements regarding signage, provided however that the Department may further specify minimum signage requirements. Neon signage is prohibited at all times; 3) shall not display on the exterior of the facility advertisements for marijuana or any brand name, and may only identify the building by the registered name; 4) shall not utilize graphics related to marijuana or paraphernalia on the exterior of the RMD or the building in which the RMD is located; 5) shall not advertise the price of marijuana, except that it</p> |                                                                                                                                                                                                                                                                                                                                                                                                                                                                                                                                  | <p><b>Use:</b> no impaired motor vehicle operation (no level of THC allowed), no public consumption, 21+ <b>Purchase limit:</b> 10 oz. non-concentrate (flower) every two months for medical; 1 oz./transaction for recreation, 6 plants for recreation</p> |  |

|  |  |  |  |  |  |  |                                                                                                                                                                                                                                                                                                                                                                                                                                                                                                                                                                                                                                                                                                                                                                                                                                                                                                                                                                                                                                                                                                                                                                                                                                                                                                                                                                                                                                                                                                                                                                                                          |  |  |
|--|--|--|--|--|--|--|----------------------------------------------------------------------------------------------------------------------------------------------------------------------------------------------------------------------------------------------------------------------------------------------------------------------------------------------------------------------------------------------------------------------------------------------------------------------------------------------------------------------------------------------------------------------------------------------------------------------------------------------------------------------------------------------------------------------------------------------------------------------------------------------------------------------------------------------------------------------------------------------------------------------------------------------------------------------------------------------------------------------------------------------------------------------------------------------------------------------------------------------------------------------------------------------------------------------------------------------------------------------------------------------------------------------------------------------------------------------------------------------------------------------------------------------------------------------------------------------------------------------------------------------------------------------------------------------------------|--|--|
|  |  |  |  |  |  |  | <p>shall provide a catalogue or a printed list of the prices and strains of marijuana available at the RMD to registered qualifying patients and personal caregivers upon request; 6) Marijuana, Marijuana Infused Products (MIPs), and associated products shall not be displayed or clearly visible to a person from the exterior of a RMD; 7) shall not produce any items for sale or promotional gifts, such as T-shirts or novelty items, bearing a symbol of or references to marijuana or MIPs, including the logo of the RMD; 8) advertising materials are prohibited from: a) any statement, design, representation, picture, or illustration that encourages or represents the use of marijuana for any purpose other than to treat a debilitating medical condition or related symptoms; b) any statement, design, representation, picture, or illustration that encourages or represents the recreational use of marijuana; c) any statement, design, representation, picture, or illustration related to the safety or efficacy of marijuana unless supported by substantial evidence or substantial clinical data with reasonable scientific rigor, which shall be made available upon the request of a registrant or the Department; or d) Any statement, design, representation, picture, or illustration portraying anyone under 18 years of age; 9) inside the RMD, all marijuana shall be kept in a limited access area inaccessible to any persons other than dispensary agents, Inside the RMD, all marijuana shall be stored in a locked, access controlled space in a limited</p> |  |  |
|--|--|--|--|--|--|--|----------------------------------------------------------------------------------------------------------------------------------------------------------------------------------------------------------------------------------------------------------------------------------------------------------------------------------------------------------------------------------------------------------------------------------------------------------------------------------------------------------------------------------------------------------------------------------------------------------------------------------------------------------------------------------------------------------------------------------------------------------------------------------------------------------------------------------------------------------------------------------------------------------------------------------------------------------------------------------------------------------------------------------------------------------------------------------------------------------------------------------------------------------------------------------------------------------------------------------------------------------------------------------------------------------------------------------------------------------------------------------------------------------------------------------------------------------------------------------------------------------------------------------------------------------------------------------------------------------|--|--|

|                 |       |   |  |                                                                                                             |                                                                                                                                                                                                                                                                                                                                                                                                                                                               |                                                                                                                                                                                                                                                                    |                                                                                                                                                                                                                                                                                                                                                                                                                                                                                                                                                                                                                                                                                                                                                                                                                       |                                                                                                                                                                                                                                                                                                                                                                                                                                                                                                                         |                                                                                                                                                                                                                                                                                                                                                                                                                |
|-----------------|-------|---|--|-------------------------------------------------------------------------------------------------------------|---------------------------------------------------------------------------------------------------------------------------------------------------------------------------------------------------------------------------------------------------------------------------------------------------------------------------------------------------------------------------------------------------------------------------------------------------------------|--------------------------------------------------------------------------------------------------------------------------------------------------------------------------------------------------------------------------------------------------------------------|-----------------------------------------------------------------------------------------------------------------------------------------------------------------------------------------------------------------------------------------------------------------------------------------------------------------------------------------------------------------------------------------------------------------------------------------------------------------------------------------------------------------------------------------------------------------------------------------------------------------------------------------------------------------------------------------------------------------------------------------------------------------------------------------------------------------------|-------------------------------------------------------------------------------------------------------------------------------------------------------------------------------------------------------------------------------------------------------------------------------------------------------------------------------------------------------------------------------------------------------------------------------------------------------------------------------------------------------------------------|----------------------------------------------------------------------------------------------------------------------------------------------------------------------------------------------------------------------------------------------------------------------------------------------------------------------------------------------------------------------------------------------------------------|
|                 |       |   |  |                                                                                                             |                                                                                                                                                                                                                                                                                                                                                                                                                                                               |                                                                                                                                                                                                                                                                    | access area during non-business hours; 10) may display, in secure, locked cases, no more than one sample of each product offered for sale. These display cases may be transparent; 11) the Department shall maintain and make available a list of all RMDs, their dispensing location, and their contact information                                                                                                                                                                                                                                                                                                                                                                                                                                                                                                  |                                                                                                                                                                                                                                                                                                                                                                                                                                                                                                                         |                                                                                                                                                                                                                                                                                                                                                                                                                |
| <b>Michigan</b> | Legal | ✓ |  | Proposal 1 (2008, 2018); Michigan Medical Marihuana Program; retail recreational structure expected by 2020 |                                                                                                                                                                                                                                                                                                                                                                                                                                                               |                                                                                                                                                                                                                                                                    |                                                                                                                                                                                                                                                                                                                                                                                                                                                                                                                                                                                                                                                                                                                                                                                                                       |                                                                                                                                                                                                                                                                                                                                                                                                                                                                                                                         | <b>Use:</b> may possess up to 2.5 oz. of concentrate; may store 10 oz. flower and 12 plants (over 2.5 oz. must be secured in locked container); no public consumption or impaired motor vehicle operation; 21+                                                                                                                                                                                                 |
| <b>Nevada</b>   | Legal | ✓ |  | Question 9, NRS 453A NAC 453A (2000); Advertising Guidelines for Medical Marijuana Establishments (MMEs)    | <b>Label:</b> clear and unambiguous, organic label must meet national organic standards, statement to identify product as marijuana, no images of cartoons, mascots, toys, appeal to children, indicate total servings of product (in 10 mg units), ingredients, amount/quantity, THC/CBD%<br><b>Packaging:</b> child-resistant; marijuana-infused products must have plastic at least 4mm thick, heat-sealed and protect from contamination, not transparent | <b>With Product:</b> all sales include written notification to keep away from children, potential 2-hour delay of effects, no pregnant women use, criminal warning for using and driving<br><b>Operation:</b> deliveries by licensed retailer in enclosed vehicle; | <b>General advertising:</b> MMEs must have discreet and professional signage that is consistent with the traditional style of signage for pharmacies and medical offices<br><b>Retail advertising:</b> a marijuana establishment: 1) shall not engage in advertising which contains any statement or illustration: a) is false or misleading; b) promotes overconsumption of marijuana or marijuana products; c) depicts actual consumption of marijuana or marijuana products; d) depicts a child or other person who is less than 21 years of age consuming marijuana or marijuana products or objects suggesting the presence of a child, including, without limitation, toys, characters or cartoons, or contains any other depiction which is designed in any way to be appealing to or encourage consumption of | <b>Logos and signs:</b> approval is required of the Administrator of the Division of Public and Behavioral Health of any medical marijuana establishment (MME) name, logo, sign or advertisement before it is used by the MME and: 1) overall design of any submission should be tasteful, respectful, and medically-focused. The look must be “medical” or “pharmaceutical,” and should contain no reference to or perception of being high, fun or recreational in nature. Names, logos, signs or advertisements most | <b>Use:</b> ingest 10 mg of THC, wait at least two hours before next serving, no impaired motor vehicle operation (2 ng THC limit), no public consumption, 21+<br><b>Serving/dose, edible:</b> 10 mg; 100 mg in single package<br><b>Purchase limit:</b> 5 oz. non-concentrate (flower)/month for medical; 1 oz. for recreation, 3.5 g concentrate, 6 plants for recreation (25 miles away from retail stores) |



|  |  |  |  |  |  |                                                                                                                                                                                                                                                                                                                                                                                                                                                                                                                                                                                                                                                                                                                                                                                                                                                                                                                                                                                                                                                                                                                                                                                                                                                                            |                                                                                                                                                                                                                                                                                                                                                                                                                                                                                                                                                                                                                                                                                                                                                                                                                                                                                                                        |  |
|--|--|--|--|--|--|----------------------------------------------------------------------------------------------------------------------------------------------------------------------------------------------------------------------------------------------------------------------------------------------------------------------------------------------------------------------------------------------------------------------------------------------------------------------------------------------------------------------------------------------------------------------------------------------------------------------------------------------------------------------------------------------------------------------------------------------------------------------------------------------------------------------------------------------------------------------------------------------------------------------------------------------------------------------------------------------------------------------------------------------------------------------------------------------------------------------------------------------------------------------------------------------------------------------------------------------------------------------------|------------------------------------------------------------------------------------------------------------------------------------------------------------------------------------------------------------------------------------------------------------------------------------------------------------------------------------------------------------------------------------------------------------------------------------------------------------------------------------------------------------------------------------------------------------------------------------------------------------------------------------------------------------------------------------------------------------------------------------------------------------------------------------------------------------------------------------------------------------------------------------------------------------------------|--|
|  |  |  |  |  |  | <p>marijuana or marijuana products by a person who is less than 21 years of age. 2) shall not advertise in any publication or on radio, television, or any other medium if 30 percent or more of the audience of that medium is reasonably expected to be persons who are less than 21 years of age; 3) shall not place an advertisement: a) within 1,000 feet of a public or private school, playground, public park or library, but may maintain such an advertisement if it was initially placed before the school, playground, public park or library was located within 1,000 feet of the location of the advertisement; b) on or inside of a motor vehicle used for public transportation or any shelter for public transportation; or c) at a sports or entertainment event to which persons who are less than 21 years of age are allowed entry; 4) shall not advertise or offer any marijuana or marijuana product as “free” or “donated” without a purchase; 5) shall ensure that all advertising by the marijuana establishment contains such warnings as may be prescribed by the Department , which must include, without limitation, the following words: a) “Keep out of reach of children”; and b) “For use only by adults 21 years of age and older.”</p> | <p>likely to be approved will not appeal to minors, contain cartoon*-like figures or illustrations or contain attempts at humor; 2) preferred typography selections include using clean fonts (sans serif), and avoiding script, decorative or gimmicky fonts. It is preferred that a maximum of two fonts and three colors are used in the designs; 3) acceptable words or references include, but are not limited to: green; wellness; compassion; health; patient; therapy; care; garden; nature; marijuana; and cannabis; 4) designers shall avoid making unfounded claims or promises or using the word “cure;” 5) designers shall avoid using marijuana slang such as bud, pot, weed, grass, joint, doobie, 420; 6) all logos submitted for approval must also be used on business cards, letterhead, and any other types of stationery used by the MME, as well as any advertisements purchased by the MME.</p> |  |
|--|--|--|--|--|--|----------------------------------------------------------------------------------------------------------------------------------------------------------------------------------------------------------------------------------------------------------------------------------------------------------------------------------------------------------------------------------------------------------------------------------------------------------------------------------------------------------------------------------------------------------------------------------------------------------------------------------------------------------------------------------------------------------------------------------------------------------------------------------------------------------------------------------------------------------------------------------------------------------------------------------------------------------------------------------------------------------------------------------------------------------------------------------------------------------------------------------------------------------------------------------------------------------------------------------------------------------------------------|------------------------------------------------------------------------------------------------------------------------------------------------------------------------------------------------------------------------------------------------------------------------------------------------------------------------------------------------------------------------------------------------------------------------------------------------------------------------------------------------------------------------------------------------------------------------------------------------------------------------------------------------------------------------------------------------------------------------------------------------------------------------------------------------------------------------------------------------------------------------------------------------------------------------|--|

|            |       |   |  |                                                                                                                                        |                                                                                                                                                                                                                                                                                                                                                                                 |                                                                         |                                                                                                                                                                                                     |                                                                                                                                                                                                                                                                                                                                                                                                                                                                                                                                                                                                                                                                                                                              |                                                                                                                                                                                                                                                                                                    |
|------------|-------|---|--|----------------------------------------------------------------------------------------------------------------------------------------|---------------------------------------------------------------------------------------------------------------------------------------------------------------------------------------------------------------------------------------------------------------------------------------------------------------------------------------------------------------------------------|-------------------------------------------------------------------------|-----------------------------------------------------------------------------------------------------------------------------------------------------------------------------------------------------|------------------------------------------------------------------------------------------------------------------------------------------------------------------------------------------------------------------------------------------------------------------------------------------------------------------------------------------------------------------------------------------------------------------------------------------------------------------------------------------------------------------------------------------------------------------------------------------------------------------------------------------------------------------------------------------------------------------------------|----------------------------------------------------------------------------------------------------------------------------------------------------------------------------------------------------------------------------------------------------------------------------------------------------|
| Oregon     | Legal | ✓ |  | Oregon Medical Marijuana Act (1998); SB 161 (2007); Measure 91 (2014); Oregon's Medical Marijuana Dispensary Program Forms and Signage | <b>Label:</b> English language (with others), unobstructed and conspicuous, producer's name and licensee number, retailer name (if different from producer), date of harvest, name of strain, amount/quantity, THC/CBD%, universal cannabis symbol, 8-point or larger font.), warning statement of: 21+ use, no motor vehicle operation, no misleading or untruthful statements | <b>Operations:</b> deliveries by licensed retailer in enclosed vehicle; | <b>General advertising:</b> prohibit any advertising by manufacturers, processors, wholesalers or retailers of marijuana items by the medium of newspapers, letters, billboards, radio or otherwise | <b>Signage:</b> a licensee must post, conspicuously, in English and Spanish (12"x12") at every licensed premises a sign reading: "No Minors Permitted Anywhere on This Premises"; and "No On-Site Consumption of Marijuana"; at all areas of ingress or egress to a limited access area a sign must be posted to read: "Do Not Enter – Limited Access Area – Access Limited to Licensed Personnel and Escorted Visitors." At the point of sale, a pregnancy warning poster, poisoning prevention poster, and "Educate before You Recreate" poster<br><b>With product:</b> distribute to each individual at the time of sale a Marijuana Information Card, prescribed by the Authority, measuring 3.5 inches high by 5 inches | <b>Use:</b> no impaired motor vehicle operation (no formal limit, based on observed impairment), no public consumption, 21+<br><b>Purchase limit:</b> 24 oz. non-concentrate (flower)/transaction for medical; 1 oz. non-concentrate (flower)/transaction 5 g concentrate, 6 plants for recreation |
| Vermont    | Legal | ✓ |  | SB 26 (2004); SB 7 (2007); SB 17 (2011); H.511 (2018): does not yet provide legal production or sales; in effect July 1, 2018          | <b>Label:</b> name of strain, amount/quantity, THC/CBD%, clearly identify that marijuana is in package, statement of no resale                                                                                                                                                                                                                                                  |                                                                         |                                                                                                                                                                                                     |                                                                                                                                                                                                                                                                                                                                                                                                                                                                                                                                                                                                                                                                                                                              | <b>Use:</b> adults 21+ may possess up to one oz.; selling cannabis is illegal; adults may grow two mature plants; no public consumption allowed                                                                                                                                                    |
| Washington | Legal | ✓ |  | Initiative 692 (1998); SB 5798 (2010); SB 5073                                                                                         | <b>Label:</b> retailer name, unique identifier number, inventory number,                                                                                                                                                                                                                                                                                                        | <b>With product:</b> material attached to or separate to                | <b>General advertising:</b> 1) all marijuana advertising and labels of useable marijuana and                                                                                                        | <b>Signs and outdoor advertising:</b> 1) licensees are limited                                                                                                                                                                                                                                                                                                                                                                                                                                                                                                                                                                                                                                                               | <b>Use:</b> no impaired motor vehicle operation (no                                                                                                                                                                                                                                                |

|  |  |  |  |                                                                 |                                                                                                                                                                                                                                                                                                                                                                                                     |                                                    |                                                                                                                                                                                                                                                                                                                                                                                                                                                                                                                                                                                                                                                                                                                                                                                                                                                                                                                                                                                                                                                                                                                                                                                                                                                                                                                                                                                                                                                                                                                                                                               |                                                                                                                                                                                                                                                                                                                                                                                                                                                                                                                                                                                                                                                                                                                                                                                                                                                                                                                   |                                                                                                                                                                                                                                                |
|--|--|--|--|-----------------------------------------------------------------|-----------------------------------------------------------------------------------------------------------------------------------------------------------------------------------------------------------------------------------------------------------------------------------------------------------------------------------------------------------------------------------------------------|----------------------------------------------------|-------------------------------------------------------------------------------------------------------------------------------------------------------------------------------------------------------------------------------------------------------------------------------------------------------------------------------------------------------------------------------------------------------------------------------------------------------------------------------------------------------------------------------------------------------------------------------------------------------------------------------------------------------------------------------------------------------------------------------------------------------------------------------------------------------------------------------------------------------------------------------------------------------------------------------------------------------------------------------------------------------------------------------------------------------------------------------------------------------------------------------------------------------------------------------------------------------------------------------------------------------------------------------------------------------------------------------------------------------------------------------------------------------------------------------------------------------------------------------------------------------------------------------------------------------------------------------|-------------------------------------------------------------------------------------------------------------------------------------------------------------------------------------------------------------------------------------------------------------------------------------------------------------------------------------------------------------------------------------------------------------------------------------------------------------------------------------------------------------------------------------------------------------------------------------------------------------------------------------------------------------------------------------------------------------------------------------------------------------------------------------------------------------------------------------------------------------------------------------------------------------------|------------------------------------------------------------------------------------------------------------------------------------------------------------------------------------------------------------------------------------------------|
|  |  |  |  | <p>(2011); Initiative 502 (2012); WAC314-55-155 Advertising</p> | <p>amount/quantity, pesticide disclosure statement, organic label must meet national standard, lot number, producer number, THC/CBD%, total milligrams of THC, date of manufacture, date of harvest, best by date, pesticide description, warning statement of: no pregnant use, health hazards, intoxicating effects</p> <p><b>Packaging:</b> child-resistant, must protect from contamination</p> | <p>warn of intoxication, use by pregnant woman</p> | <p>marijuana-infused products sold in the state of Washington may not contain any statement, or illustration that: a) are false or misleading; b) promotes over consumption; c) represents the use of marijuana has curative or therapeutic effects; d) depicts a child or other person under legal age to consume marijuana, or includes: (i) Objects, such as toys, characters, or cartoon characters suggesting the presence of a child, or any other depiction designed in any manner to be especially appealing to children or other persons under legal age to consume marijuana; or (ii) Is designed in any manner that would be especially appealing to children or other persons under 21 years of age; 2) transit advertising is prohibited on or in public or private vehicles and at bus stops, taxi stands, transportation waiting areas, train stations, airports, etc.; includes vinyl wrapped vehicles, logoed delivery vehicles/company cars; 3) all print advertising must contain text that marijuana products may be purchased or possessed only by persons 21 years of age or older; 4) licensees are prohibited from engaging in advertising that specifically targets persons outside the state of Washington; 5) no licensed marijuana producer, processor, or retailer shall place or maintain, or cause to be placed or maintained, an advertisement of marijuana, usable marijuana, or a marijuana-infused product in any form or through any medium whatsoever: a) within one thousand feet of the perimeter of a school grounds, playground,</p> | <p>to two signs (maximum 1600 sq. inches) that are permanently affixed to a building or other structure on the licensed premises; 2) other forms of signage/outdoor advertising are prohibited, such as sign spinners, sandwich boards, inflatables, persons in costume, etc.; 3) signs are limited to the following information: a) business or tradename, b) business location, and c) identifying the nature of the business; 4) signs must contain text stating that marijuana products may be purchased or possessed only by persons 21 years of age or older; 5) signs cannot contain depictions of plants or products (ex: leaf = plant, joint = product), or use movie or cartoon characters, or any other depiction that might be appealing to children; 6) signs may contain: a) images (cannot be plants, products appealing to children, etc.); b) logos: may not contain plants, products, or be</p> | <p>formal THC limit, considering 5 ng), no public consumption, 21+ <b>Purchase limit:</b> 3 oz. non-concentrate (flower), 21 g concentrate for medical/transaction; 1 oz. flower, 7 g concentrate for recreation, no plants for recreation</p> |
|--|--|--|--|-----------------------------------------------------------------|-----------------------------------------------------------------------------------------------------------------------------------------------------------------------------------------------------------------------------------------------------------------------------------------------------------------------------------------------------------------------------------------------------|----------------------------------------------------|-------------------------------------------------------------------------------------------------------------------------------------------------------------------------------------------------------------------------------------------------------------------------------------------------------------------------------------------------------------------------------------------------------------------------------------------------------------------------------------------------------------------------------------------------------------------------------------------------------------------------------------------------------------------------------------------------------------------------------------------------------------------------------------------------------------------------------------------------------------------------------------------------------------------------------------------------------------------------------------------------------------------------------------------------------------------------------------------------------------------------------------------------------------------------------------------------------------------------------------------------------------------------------------------------------------------------------------------------------------------------------------------------------------------------------------------------------------------------------------------------------------------------------------------------------------------------------|-------------------------------------------------------------------------------------------------------------------------------------------------------------------------------------------------------------------------------------------------------------------------------------------------------------------------------------------------------------------------------------------------------------------------------------------------------------------------------------------------------------------------------------------------------------------------------------------------------------------------------------------------------------------------------------------------------------------------------------------------------------------------------------------------------------------------------------------------------------------------------------------------------------------|------------------------------------------------------------------------------------------------------------------------------------------------------------------------------------------------------------------------------------------------|

|                    |            |   |  |                                                                 |                                                                                                                                                                                                                                                           |  |                                                                                                                                                                                                                                                                                                                                                                                                                                                                                                                                                                                                                                                                                                                                                     |                                                                                                                                                                                                                                                                                                                                                                                                                                           |                                                       |
|--------------------|------------|---|--|-----------------------------------------------------------------|-----------------------------------------------------------------------------------------------------------------------------------------------------------------------------------------------------------------------------------------------------------|--|-----------------------------------------------------------------------------------------------------------------------------------------------------------------------------------------------------------------------------------------------------------------------------------------------------------------------------------------------------------------------------------------------------------------------------------------------------------------------------------------------------------------------------------------------------------------------------------------------------------------------------------------------------------------------------------------------------------------------------------------------------|-------------------------------------------------------------------------------------------------------------------------------------------------------------------------------------------------------------------------------------------------------------------------------------------------------------------------------------------------------------------------------------------------------------------------------------------|-------------------------------------------------------|
|                    |            |   |  |                                                                 |                                                                                                                                                                                                                                                           |  | recreation center or facility, child care center, public park, library, or a game arcade admission to which it is not restricted to persons aged twenty-one years or older; b) on or in a public transit vehicle or public transit shelter; or c) on or in a publicly owned or operated property; 6) all advertising must contain the following warnings: a) "This product has intoxicating effects and may be habit forming."; b) "Marijuana can impair concentration, coordination, and judgment. Do not operate a vehicle or machinery under the influence of this drug."; c) "There may be health risks associated with consumption of this product."; and d) "For use only by adults twenty-one and older. Keep out of the reach of children." | appealing to children, etc.<br><b>Billboards:</b> licensed retail outlets may use a billboard solely for the purpose of identifying the name of the business, the nature of the business, and providing the public with directional information to the licensed retail outlet; subject to the same restrictions as outdoor signs/advertising<br><b>Promotions:</b> giveaways, coupons, and distribution of branded merchandise are banned |                                                       |
| <b>Arizona</b>     | Prohibited | ✓ |  | Proposition 203 (2010); R9-17-317 Product Labeling and Analysis | <b>Label:</b> dispensary registry identification number, amount/quantity, strain, batch number, date of manufacture/harvest/sale, warning statement of: carcinogens in smoke, impairment, possible addiction, chemicals and pesticides used in production |  |                                                                                                                                                                                                                                                                                                                                                                                                                                                                                                                                                                                                                                                                                                                                                     |                                                                                                                                                                                                                                                                                                                                                                                                                                           |                                                       |
| <b>Arkansas</b>    | Prohibited | ✓ |  | Ballot Measure Issue 6 (2106)                                   |                                                                                                                                                                                                                                                           |  |                                                                                                                                                                                                                                                                                                                                                                                                                                                                                                                                                                                                                                                                                                                                                     |                                                                                                                                                                                                                                                                                                                                                                                                                                           | <b>Purchase limit:</b> 3 oz. flower per 14-day period |
| <b>Connecticut</b> | Prohibited | ✓ |  | HB 5389 (2012), Sec. 21a-408-56, 21a-408-66 Marketing           | <b>Label:</b> name and address of producer, registered brand name, unique serial number, date of final testing/packaging, expiration date, THC/CBD%, pass/fail rating of contaminant analysis                                                             |  | <b>General advertising:</b> 1) there shall be no direct or indirect cooperative advertising between or among two or more of the following: a producer, dispensary facility personnel, or physician where such advertising has the purpose or effect of steering or influencing patient or caregiver choice with regard to                                                                                                                                                                                                                                                                                                                                                                                                                           |                                                                                                                                                                                                                                                                                                                                                                                                                                           | <b>Use:</b> may possess up to 2.5 oz. flower          |

|  |  |  |  |  |                                                                                                                                |  |                                                                                                                                                                                                                                                                                                                                                                                                                                                                                                                                                                                                                                                                                                                                                                                                                                                                                                                                                                                                                                                                                                                                                                                                                                                                                                                                                                                                                                                                                                                                                        |  |
|--|--|--|--|--|--------------------------------------------------------------------------------------------------------------------------------|--|--------------------------------------------------------------------------------------------------------------------------------------------------------------------------------------------------------------------------------------------------------------------------------------------------------------------------------------------------------------------------------------------------------------------------------------------------------------------------------------------------------------------------------------------------------------------------------------------------------------------------------------------------------------------------------------------------------------------------------------------------------------------------------------------------------------------------------------------------------------------------------------------------------------------------------------------------------------------------------------------------------------------------------------------------------------------------------------------------------------------------------------------------------------------------------------------------------------------------------------------------------------------------------------------------------------------------------------------------------------------------------------------------------------------------------------------------------------------------------------------------------------------------------------------------------|--|
|  |  |  |  |  | <p><b>Packaging:</b> individual package, label, seal of no more than one month supply, child-resistant and light-resistant</p> |  | <p>their selection of a physician, dispensary or marijuana product; 2) an advertisement for marijuana or any marijuana product shall not contain: a) any statement that is false or misleading in any material particular or is otherwise in violation of the Connecticut Unfair Trade Practices Act, section 42-110b et seq., of the Connecticut General Statutes; b) any statement that falsely disparages a competitor's products; c) any statement, design, or representation, picture or illustration that is obscene or indecent; d) any statement, design, representation, picture or illustration that encourages or represents the use of marijuana for a condition other than a debilitating medical condition; e) any statement, design, representation, picture or illustration that encourages or represents the recreational use of marijuana; f) any statement, design, representation, picture or illustration related to the safety or efficacy of marijuana unless supported by substantial evidence or substantial clinical data; g) any statement, design, representation, picture or illustration portraying anyone under the age of 18, objects suggestive of the presence of anyone under the age of 18, or contains the use of a figure, symbol or language that is customarily associated with anyone under the age of 18; h) any offer of a prize or award to a qualifying patient, primary caregiver or physician related to the purchase of marijuana or a certification for the use of marijuana; or i) any statement</p> |  |
|--|--|--|--|--|--------------------------------------------------------------------------------------------------------------------------------|--|--------------------------------------------------------------------------------------------------------------------------------------------------------------------------------------------------------------------------------------------------------------------------------------------------------------------------------------------------------------------------------------------------------------------------------------------------------------------------------------------------------------------------------------------------------------------------------------------------------------------------------------------------------------------------------------------------------------------------------------------------------------------------------------------------------------------------------------------------------------------------------------------------------------------------------------------------------------------------------------------------------------------------------------------------------------------------------------------------------------------------------------------------------------------------------------------------------------------------------------------------------------------------------------------------------------------------------------------------------------------------------------------------------------------------------------------------------------------------------------------------------------------------------------------------------|--|

|                 |            |   |  |                                                                                             |                                                                                                                                 |  |                                                                                                                                                                                                                                                                                                                                                                                                                                                                                                                                                                                                                                                                                                                                                                                                                                                                                                                                                                                                                                                                                                                                                                                                                                                                 |  |                                            |
|-----------------|------------|---|--|---------------------------------------------------------------------------------------------|---------------------------------------------------------------------------------------------------------------------------------|--|-----------------------------------------------------------------------------------------------------------------------------------------------------------------------------------------------------------------------------------------------------------------------------------------------------------------------------------------------------------------------------------------------------------------------------------------------------------------------------------------------------------------------------------------------------------------------------------------------------------------------------------------------------------------------------------------------------------------------------------------------------------------------------------------------------------------------------------------------------------------------------------------------------------------------------------------------------------------------------------------------------------------------------------------------------------------------------------------------------------------------------------------------------------------------------------------------------------------------------------------------------------------|--|--------------------------------------------|
|                 |            |   |  |                                                                                             |                                                                                                                                 |  | <p>that indicates or implies that the product or entity in the advertisement has been approved or endorsed by the commissioner, department, the State of Connecticut or any person or entity associated with the State of Connecticut; 3) all advertisements for marijuana or marijuana products (broadcast through media such as radio, television, or other electronic media) that make a statement relating to side effects, contraindications and effectiveness shall present a true statement of such information</p> <p><b>Outdoor advertising:</b> a dispensary facility shall: 1) restrict external signage to a single sign no larger than 16 X 18 inches;</p> <p>2) not illuminate a dispensary facility sign advertising a marijuana product at any time;</p> <p>3) not advertise marijuana brand names or utilize graphics related to marijuana or paraphernalia on the exterior of the dispensary facility or the building in which the dispensary facility is located; and</p> <p>4) not display marijuana and paraphernalia so as to be clearly visible from the exterior of a dispensary facility and (b) a producer shall not advertise the price of its marijuana except that it may make a price list available to a dispensary facility</p> |  |                                            |
| <b>Delaware</b> | Prohibited | ✓ |  | SB 17 (2011); 4470 State of Delaware Medical Marijuana Code; Delaware Medical Marijuana Act | <b>Label:</b> name of strain, batch, amount/quantity, statement of medical use and no resale, contaminant-free notice, THC/CBD% |  | <b>General advertising:</b> no person may advertise medical marijuana sales in print, broadcast, or by paid in-person solicitation of customers. This shall not prevent appropriate signs on the property of the registered compassion center, listings in business directories including phone books, listings in trade or                                                                                                                                                                                                                                                                                                                                                                                                                                                                                                                                                                                                                                                                                                                                                                                                                                                                                                                                     |  | <b>Use:</b> may possess up to 6 oz. flower |

|                |            |   |  |                                                                                                          |                                                                                                                                                                                                                                                                                                                                                                                                                                    |                                                                                                |                                                                                                                                                                                                                                                                                                                                                                                                                                                                                                                                                                                                                                                                                                                                                                                                                                                                                                                                                                                                                                                                                         |  |  |
|----------------|------------|---|--|----------------------------------------------------------------------------------------------------------|------------------------------------------------------------------------------------------------------------------------------------------------------------------------------------------------------------------------------------------------------------------------------------------------------------------------------------------------------------------------------------------------------------------------------------|------------------------------------------------------------------------------------------------|-----------------------------------------------------------------------------------------------------------------------------------------------------------------------------------------------------------------------------------------------------------------------------------------------------------------------------------------------------------------------------------------------------------------------------------------------------------------------------------------------------------------------------------------------------------------------------------------------------------------------------------------------------------------------------------------------------------------------------------------------------------------------------------------------------------------------------------------------------------------------------------------------------------------------------------------------------------------------------------------------------------------------------------------------------------------------------------------|--|--|
|                |            |   |  |                                                                                                          |                                                                                                                                                                                                                                                                                                                                                                                                                                    |                                                                                                | medical publications, or the sponsorship of health or not-for-profit charity or advocacy events; a registered compassion center shall not share office space with nor refer patients to a physician; a physician shall not refer patients to a registered compassion center or registered designated caregiver, advertise in a registered compassion center, or, if the physician issues written certifications, hold any financial interest in a registered compassion center                                                                                                                                                                                                                                                                                                                                                                                                                                                                                                                                                                                                          |  |  |
| <b>Florida</b> | Prohibited | ✓ |  | CS for SB 1030 (2014); Amendment 2 (2016, details pending); U.S. Poison Prevention Packaging Act of 1970 | <b>Label:</b> name of treatment center, batch number, date dispensed, name of physician, name of patient, product name (if applicable), dosage form and size, THC/CBD%, warning statement of: no transfer, universal marijuana symbol<br><b>Packaging:</b> a receptacle with a firmly affixed and legible label, insert with product medical information, edibles must have plain, opaque wrapping with universal marijuana symbol | <b>With product:</b> insert with information of indications and use, dosage, adverse reactions | <b>General advertising:</b> 1) a medical marijuana treatment center may not engage in advertising that is visible to members of the public from any street, sidewalk, park, or other public place, except: a) the dispensing location of a medical marijuana treatment center may have a sign that is affixed to the outside or hanging in the window of the premises which identifies the dispensary by the licensee's business name, a department-approved trade name, or a department-approved logo; 2) a medical marijuana treatment center's trade name and logo may not contain wording or images commonly associated with marketing targeted toward children or which promote recreational use of marijuana; 3) each medical marijuana treatment center that dispenses marijuana and marijuana delivery devices shall make available to the public on its website: a) each marijuana and low-THC product available for purchase, including the form, strain of marijuana from which it was extracted, cannabidiol content, tetrahydrocannabinol content, dose unit, total number |  |  |

|                 |            |   |  |                                                                                                                                                 |                                                                                                                                                                                                                                                                                                         |  |                                                                                                                                                                                                                                                                                                                                                                                                                                                                                                                                                                                                                                                                                                                                                                                                                                                                                                                         |                                                                                                                                              |
|-----------------|------------|---|--|-------------------------------------------------------------------------------------------------------------------------------------------------|---------------------------------------------------------------------------------------------------------------------------------------------------------------------------------------------------------------------------------------------------------------------------------------------------------|--|-------------------------------------------------------------------------------------------------------------------------------------------------------------------------------------------------------------------------------------------------------------------------------------------------------------------------------------------------------------------------------------------------------------------------------------------------------------------------------------------------------------------------------------------------------------------------------------------------------------------------------------------------------------------------------------------------------------------------------------------------------------------------------------------------------------------------------------------------------------------------------------------------------------------------|----------------------------------------------------------------------------------------------------------------------------------------------|
|                 |            |   |  |                                                                                                                                                 |                                                                                                                                                                                                                                                                                                         |  | <p>of doses available, and the ratio of cannabidiol to tetrahydrocannabinol for each product; b) price for a 30-day, 50-day, and 70-day supply at a standard dose for each marijuana and low-THC product available for purchase; c) the price for each marijuana delivery device available for purchase; d) if applicable, any discount policies and eligibility criteria for such discounts</p> <p><b>Internet advertising:</b> a medical marijuana treatment center may engage in Internet advertising and marketing under the following conditions: 1) all advertisements must be approved by the department; 2) an advertisement may not have any content that specifically targets individuals under the age of 18, including cartoon characters or similar images; 3) an advertisement may not be an unsolicited pop-up advertisement; 4) opt-in marketing must include an easy and permanent opt out feature</p> |                                                                                                                                              |
| <b>Hawaii</b>   | Prohibited | ✓ |  | <p>SB 862 (2000); Chapter 32D Medical Marijuana Dispensary System; State of Hawaii Department of Health Medical Marijuana Registry Program.</p> | <p><b>Label:</b> black lettering on white background, no pictures or graphics, statement for medical use, statement against transfer, THC/CBD%, name of production center, batch number, date of packaging, barcode, use instructions, use by date</p> <p><b>Packaging:</b> child-resistant, opaque</p> |  | <p><b>General advertising:</b> a dispensary shall not: 1) display marijuana or manufactured marijuana products in windows in public view; or 2) post any signage other than a single sign no greater than 1,600 square inches bearing only the business or trade name in text without any pictures or illustrations; provided that if any applicable law or ordinance restricting outdoor signage is more restrictive, that law or ordinance shall govern</p>                                                                                                                                                                                                                                                                                                                                                                                                                                                           | <p><b>Use:</b> may possess up to 4 oz. flower, may grow up to 10 plants</p> <p><b>Serving/dose, edible:</b> 100 mg THC limit per package</p> |
| <b>Illinois</b> | Prohibited | ✓ |  | <p>HB 1 (2013); Compassionate Use of Medical Cannabis Act; Rules and Administration Of The Compassionate</p>                                    | <p><b>Label:</b> English language, name and address of cultivation center, name of product, unique serial number, date of testing and packing, date of</p>                                                                                                                                              |  | <p><b>General advertising:</b> no registered dispensing organization shall place or maintain, or cause to be placed or maintained, an advertisement of cannabis or a cannabis-</p>                                                                                                                                                                                                                                                                                                                                                                                                                                                                                                                                                                                                                                                                                                                                      | <p><b>Purchase limit:</b> 2.5 oz. flower in 14-day period</p>                                                                                |



|                  |            |   |  |                                                                                                                                                                                                                     |                                                                                                                                                                                                                                                                                                                                                                                                                         |  |                                                                                                                                                                                                                                                                                                                                                                                                                                |                                                                                                                                                                                      |                                                                                                                       |
|------------------|------------|---|--|---------------------------------------------------------------------------------------------------------------------------------------------------------------------------------------------------------------------|-------------------------------------------------------------------------------------------------------------------------------------------------------------------------------------------------------------------------------------------------------------------------------------------------------------------------------------------------------------------------------------------------------------------------|--|--------------------------------------------------------------------------------------------------------------------------------------------------------------------------------------------------------------------------------------------------------------------------------------------------------------------------------------------------------------------------------------------------------------------------------|--------------------------------------------------------------------------------------------------------------------------------------------------------------------------------------|-----------------------------------------------------------------------------------------------------------------------|
|                  |            |   |  | Use Of Medical Cannabis Pilot Program Section 1290.455 Dispensary Advertisements                                                                                                                                    | manufacture, use by date, amount/quantity, pass/fail lab results, THC/CBD%, statement of medical use<br><b>Packaging:</b> sealed and labeled medical cannabis container, child-resistant, light-resistant                                                                                                                                                                                                               |  | infused product in any form or through any medium:<br>1) within 1,000 feet of the perimeter of a school grounds, playground, recreation center or facility, child care center, public park or library, or any game arcade admission to which is not restricted to persons age 21 years or older;<br>2) on or in a public transit vehicle or public transit shelter;<br>or<br>3) on or in a publicly-owned or-operated property |                                                                                                                                                                                      |                                                                                                                       |
| <b>Louisiana</b> | Prohibited | ✓ |  | SB 271 (2017, pending implementation)                                                                                                                                                                               |                                                                                                                                                                                                                                                                                                                                                                                                                         |  |                                                                                                                                                                                                                                                                                                                                                                                                                                |                                                                                                                                                                                      |                                                                                                                       |
| <b>Maryland</b>  | Prohibited | ✓ |  | HB 702 (2003); SB 308 (2011); HB 180/SB 580 (2013); HB 1101-Chapter 403 (2013); SB 923 (2014); Subtitle 62 of the Maryland Department of Health and Mental Hygiene; Maryland's Medical Cannabis Laws & Regulations. | <b>Label:</b> lot number and expiration date, warning statement, Maryland Poison Control telephone number, name and telephone number of licensee, amount/quantity, THC/CBD%, warning statement of: no transfer, keep away from children<br><b>Packaging:</b> plain, opaque, tamper-evident, child-resistant, no resemblance to trademarked food or beverage, no cartoon, color scheme or graphic attractive to children |  |                                                                                                                                                                                                                                                                                                                                                                                                                                |                                                                                                                                                                                      | <b>Use:</b> may possess 30-day supply                                                                                 |
| <b>Minnesota</b> | Prohibited | ✓ |  | SF 2471, Chapter 311 (2014); 4770.0850 Packaging and Labeling Minnesota Statutes 2012, Subdivision 22, Medical use of cannabis data.                                                                                | <b>Label:</b> patient's registry number, name, birthdate, address, name and address of manufacturer, date of manufacture, THC/CBD%, recommended dosage, product use directions, ingredients, no false or misleading statements, warning statement of: no approval by FDA, keep away from children                                                                                                                       |  |                                                                                                                                                                                                                                                                                                                                                                                                                                | <b>Naming:</b> limited to reflect medical nature, cannot be confusingly similar to unlawful product or existing non-cannabis product, cannot be suggestive of a recreational purpose | <b>Use:</b> may possess up to 30-day supply of non-smokable marijuana<br><b>Product:</b> liquid extract products only |

|                      |            |   |  |                                                                                                                  |                                                                                                                                                                                                   |  |                                                                                                                                                                                                                       |  |                                                                                                                                                                                                                                                                                                                                                                                                       |
|----------------------|------------|---|--|------------------------------------------------------------------------------------------------------------------|---------------------------------------------------------------------------------------------------------------------------------------------------------------------------------------------------|--|-----------------------------------------------------------------------------------------------------------------------------------------------------------------------------------------------------------------------|--|-------------------------------------------------------------------------------------------------------------------------------------------------------------------------------------------------------------------------------------------------------------------------------------------------------------------------------------------------------------------------------------------------------|
|                      |            |   |  |                                                                                                                  | <b>Packaging:</b> plain, designed to maximize shelf life of medical cannabis, tamper-evident, child-resistant, must minimize appeal to children, must not resemble commercially available product |  |                                                                                                                                                                                                                       |  |                                                                                                                                                                                                                                                                                                                                                                                                       |
| <b>Missouri</b>      | Prohibited | ✓ |  | HB 2238 (2014); Amendment 2 (2018); medical cannabis infrastructure and policy pending                           |                                                                                                                                                                                                   |  |                                                                                                                                                                                                                       |  | <b>Use:</b> may possess 60-day supply, grow 6 plants in home, purchase 4 oz. of dried cannabis; possess not less than a 60-day supply of dried marijuana; licensed physicians recommend to patients with nine qualifying conditions and additional conditions with a doctor's approval<br><br><b>Product:</b> "hemp extracts" equal or less than three-tenths (.3)% THC and at least 5% CBD by weight |
| <b>Montana</b>       | Prohibited | ✓ |  | Initiative 148 (2004); SB 423 (2011), Initiative 182 (2016); Montana Code Annotated 2015 – Montana Marijuana Act |                                                                                                                                                                                                   |  | <b>Advertising:</b> persons with licenses and individuals with valid registry identification cards may not advertise marijuana or marijuana-related products in any medium, including electronic media                |  | <b>Use:</b> may possess up to 1 oz. flower, 4 mature plants, 12 seedlings                                                                                                                                                                                                                                                                                                                             |
| <b>New Hampshire</b> | Prohibited | ✓ |  | HB 573 (2013); Title X – Public Health, Chapter 126-X, Use of Cannabis for Therapeutic Purposes                  | <b>Label:</b> clear and truthful, legible, firmly affixed, name and address of alternative treatment center/cultivator, amount/quantity, date packaged, serial number,                            |  | <b>General advertising:</b> the department shall adopt rules, pursuant to RSA 541-A, governing alternative treatment centers and the manner in which it shall consider applications for registration certificates for |  | <b>Purchase limit:</b> 2 oz. of cannabis during a 10-day period                                                                                                                                                                                                                                                                                                                                       |

|                   |            |   |  |                                                                                                          |                                                                                                                                                                                                                                                                                                                      |  |                                                                                                                                                                                                                                                                                                                                                                                                                                                                                                                                                                                                                                                                                                                                                                                                                                                                                            |                                                                                                                                                                                                                                                                                                                                                                                                                |                                                                                                                      |
|-------------------|------------|---|--|----------------------------------------------------------------------------------------------------------|----------------------------------------------------------------------------------------------------------------------------------------------------------------------------------------------------------------------------------------------------------------------------------------------------------------------|--|--------------------------------------------------------------------------------------------------------------------------------------------------------------------------------------------------------------------------------------------------------------------------------------------------------------------------------------------------------------------------------------------------------------------------------------------------------------------------------------------------------------------------------------------------------------------------------------------------------------------------------------------------------------------------------------------------------------------------------------------------------------------------------------------------------------------------------------------------------------------------------------------|----------------------------------------------------------------------------------------------------------------------------------------------------------------------------------------------------------------------------------------------------------------------------------------------------------------------------------------------------------------------------------------------------------------|----------------------------------------------------------------------------------------------------------------------|
|                   |            |   |  |                                                                                                          | lot number, barcode, THC/CBD%, strength (low, medium, high), any ingredients besides marijuana, statement of no FDA evaluation<br><b>Packaging:</b> alternative treatment centers must provide a plan for safe and accurate packaging of cannabis, including plan for ensuring that cannabis is free of contaminants |  | alternative treatment centers, including, but not limited to: advertising restrictions, including a prohibition of misrepresentation and unfair practices.                                                                                                                                                                                                                                                                                                                                                                                                                                                                                                                                                                                                                                                                                                                                 |                                                                                                                                                                                                                                                                                                                                                                                                                |                                                                                                                      |
| <b>New Jersey</b> | Prohibited | ✓ |  | SB 119 (2009); Subchapter 12: Marketing and Advertising; Final Rules for the Medicinal Marijuana Program |                                                                                                                                                                                                                                                                                                                      |  | <b>General advertising:</b> Alternative treatment centers shall restrict signage to black text on a white background on external signage, labeling and brochures for the alternative treatment center; alternative treatment centers shall not advertise the price of marijuana, except that: an ATC can provide a catalogue or a printed list of the prices and strains of medicinal marijuana available at the alternative treatment center to registered qualifying patients and primary caregivers<br><b>Outdoor advertising:</b> alternative treatment centers shall not display on the exterior of the facility advertisements for medicinal marijuana or a brand name except for purposes of identifying the building by the permitted name; marijuana and paraphernalia shall not be displayed or clearly visible to a person from the exterior of an alternative treatment center | <b>Signage:</b> alternative treatment center signage shall not be illuminated at any time<br><b>Promotions:</b> alternative treatment centers shall not produce any items for sale or promotional gifts, such as T-shirts or novelty items, bearing a symbol or references to marijuana. This prohibition does not pertain to paraphernalia sold to registered qualifying patients or their primary caregivers | <b>Use:</b> may possess 2 oz. of flower<br><b>Product:</b> THC must be less than 10%                                 |
| <b>New Mexico</b> | Prohibited | ✓ |  | SB 523 (2007)                                                                                            | <b>Label:</b> name of producer and manufacturer, batch number, production date or expiration date, number of units, use and storage instructions, warning statement,                                                                                                                                                 |  |                                                                                                                                                                                                                                                                                                                                                                                                                                                                                                                                                                                                                                                                                                                                                                                                                                                                                            |                                                                                                                                                                                                                                                                                                                                                                                                                | <b>Use:</b> instructions must be included on label; may possess 6 oz. of flower, 4 mature plants, 12 immature plants |

|                 |            |   |  |                                                                                                                   |                                                                                                                                                                                                                                                                                                                                                                                                                          |  |                                                                                                                                                                                                                                                                                                                                                                                                                                                                                                                                                                                                                                                                                                                                                                                                                                                                                                                                                                                                                                                                                                                                                                                  |                                                                                                                                                                                    |  |
|-----------------|------------|---|--|-------------------------------------------------------------------------------------------------------------------|--------------------------------------------------------------------------------------------------------------------------------------------------------------------------------------------------------------------------------------------------------------------------------------------------------------------------------------------------------------------------------------------------------------------------|--|----------------------------------------------------------------------------------------------------------------------------------------------------------------------------------------------------------------------------------------------------------------------------------------------------------------------------------------------------------------------------------------------------------------------------------------------------------------------------------------------------------------------------------------------------------------------------------------------------------------------------------------------------------------------------------------------------------------------------------------------------------------------------------------------------------------------------------------------------------------------------------------------------------------------------------------------------------------------------------------------------------------------------------------------------------------------------------------------------------------------------------------------------------------------------------|------------------------------------------------------------------------------------------------------------------------------------------------------------------------------------|--|
|                 |            |   |  |                                                                                                                   | laboratory analysis, THC/CBD%, name of strain, warning statement of: keep away from children, no resale, name of testing facility and type of testing<br><b>Packaging:</b> opaque, child-resistant                                                                                                                                                                                                                       |  |                                                                                                                                                                                                                                                                                                                                                                                                                                                                                                                                                                                                                                                                                                                                                                                                                                                                                                                                                                                                                                                                                                                                                                                  |                                                                                                                                                                                    |  |
| <b>New York</b> | Prohibited | ✓ |  | A6357 (2014); Official Compilation of Codes, Rules and Regulations of the State of New York for Medical Marijuana | <b>Label:</b> name, address, registration number of organization, product form and brand designation, single dose THC/CBD content in mg, lot number, amount/quantity, date packaged, expiration date, proper storage conditions, warning statement of: impairment, keep away from children<br><b>Packaging:</b> child-resistant, tamper-proof, tamper-evident, light-resistant, resealable and minimizes oxygen exposure |  | <b>General advertising:</b> 1) all advertisements, regardless of form, for approved medical marijuana products that make a statement relating to effectiveness, side effects, consequences, and contraindications shall present a true and accurate statement of such information; an advertisement does not satisfy the requirement that it presents a “true and accurate statement” of information relating to effectiveness, side effects, consequences, and contraindications if it fails to present a fair balance between information relating to effectiveness, side effects, consequences, and contraindications in that the information relating to effectiveness is presented in greater scope, depth, or detail than is the information relating to side effects, consequences and contraindications, taking into account all implementing factors such as typography, layout, contrast, headlines, paragraphing, white space, and any other techniques apt to achieve emphasis; 2) an advertisement should not include: a) any statement that is false or misleading; b) any statement that falsely disparages a competitor’s products; c) any statement, design, or | <b>Use:</b> may possess 30-day supply of non-smokable marijuana<br><b>Product:</b> limited to liquid, oil, capsules; smoking not approved; ingested doses must not exceed 10mg THC |  |

|  |  |  |  |  |  |  |                                                                                                                                                                                                                                                                                                                                                                                                                                                                                                                                                                                                                                                                                                                                                                                                                                                                                                                                                                                                                                                                                                                                                                                                                                                                                                                                                                                                                                                                                                                    |  |  |
|--|--|--|--|--|--|--|--------------------------------------------------------------------------------------------------------------------------------------------------------------------------------------------------------------------------------------------------------------------------------------------------------------------------------------------------------------------------------------------------------------------------------------------------------------------------------------------------------------------------------------------------------------------------------------------------------------------------------------------------------------------------------------------------------------------------------------------------------------------------------------------------------------------------------------------------------------------------------------------------------------------------------------------------------------------------------------------------------------------------------------------------------------------------------------------------------------------------------------------------------------------------------------------------------------------------------------------------------------------------------------------------------------------------------------------------------------------------------------------------------------------------------------------------------------------------------------------------------------------|--|--|
|  |  |  |  |  |  |  | <p>representation, picture or illustration that is obscene or indecent; d) any statement, design, representation, picture or illustration that encourages or represents the use of marihuana for a condition other than a serious condition as defined in subdivision seven of section thirty-three hundred sixty of the public health law; e) any statement, design, representation, picture or illustration that encourages or represents the recreational use of marihuana; f) any statement, design, representation, picture or illustration related to the safety or efficacy of marihuana, unless supported by substantial evidence or substantial clinical data; g) any statement, design, representation, picture or illustration portraying anyone under the age of 18, objects suggestive of the presence of anyone under the age of 18, or containing the use of a figure, symbol or language that is customarily associated with anyone under the age of 18; h) any offer of a prize, award or inducement to a certified patient, designated caregiver or practitioner related to the purchase of marihuana or a certification for the use of marihuana; or i) any statement that indicates or implies that the product or entity in the advertisement has been approved or endorsed by the commissioner, department, New York State or any person or entity associated with New York State provided that this shall not preclude a factual statement that an entity is a registered organization.</p> |  |  |
|--|--|--|--|--|--|--|--------------------------------------------------------------------------------------------------------------------------------------------------------------------------------------------------------------------------------------------------------------------------------------------------------------------------------------------------------------------------------------------------------------------------------------------------------------------------------------------------------------------------------------------------------------------------------------------------------------------------------------------------------------------------------------------------------------------------------------------------------------------------------------------------------------------------------------------------------------------------------------------------------------------------------------------------------------------------------------------------------------------------------------------------------------------------------------------------------------------------------------------------------------------------------------------------------------------------------------------------------------------------------------------------------------------------------------------------------------------------------------------------------------------------------------------------------------------------------------------------------------------|--|--|

|                      |            |   |  |                                                                                     |                                                                                                                                                                     |  |  |  |                                                                                                                                                                                                                                                                                                                                  |
|----------------------|------------|---|--|-------------------------------------------------------------------------------------|---------------------------------------------------------------------------------------------------------------------------------------------------------------------|--|--|--|----------------------------------------------------------------------------------------------------------------------------------------------------------------------------------------------------------------------------------------------------------------------------------------------------------------------------------|
| <b>North Dakota</b>  | Prohibited | ✓ |  | Measure 5 (2016); Measure 3 (2018) for recreational cannabis voted down             |                                                                                                                                                                     |  |  |  | <b>Purchase limit:</b> 3 oz. per 14-day period                                                                                                                                                                                                                                                                                   |
| <b>Ohio</b>          | Prohibited | ✓ |  | HB 523 (2016)                                                                       |                                                                                                                                                                     |  |  |  | <b>Use:</b> my possess a maximum of 90-day supply                                                                                                                                                                                                                                                                                |
| <b>Oklahoma</b>      | Prohibited | ✓ |  | HB 2154 (2015); SQ 788 (approved on 6.26.18, not yet operational)                   |                                                                                                                                                                     |  |  |  | <b>Use:</b> may possess 3 oz. of flower, 6 mature plants, 6 immature plants                                                                                                                                                                                                                                                      |
| <b>Pennsylvania</b>  | Prohibited | ✓ |  | SB 3 (2016)                                                                         |                                                                                                                                                                     |  |  |  | <b>Use:</b> may possess 30-day supply                                                                                                                                                                                                                                                                                            |
| <b>Rhode Island</b>  | Prohibited | ✓ |  | SB 791; SB 185 (2009); Edward O. Hawkins and Thomas C. Slater Medical Marijuana Act | <b>Label:</b> compassion centers shall label the packaging of useable marijuana with name of strain, batch, amount/quantity, statement of medical use and no resale |  |  |  | <b>Use:</b> may possess 2.5 oz. of flower, 12 plants                                                                                                                                                                                                                                                                             |
| <b>Utah</b>          | Prohibited | ✓ |  | HB 105 (2014); Proposition 2 (2018); legislation and policy pending                 |                                                                                                                                                                     |  |  |  | <b>Use:</b> medical card holders may purchase 2 oz. of unprocessed cannabis in a 2-week period; if residing 100+ miles from dispensary, may grow 6 plants in home; smoking prohibited, edibles and oils allowed<br><b>Product:</b> hemp extracts" with less than three-tenths (.3)% THC by weight and at least 15% CBD by weight |
| <b>West Virginia</b> | Prohibited | ✓ |  | SB 386 (2017)                                                                       |                                                                                                                                                                     |  |  |  | <b>Use:</b> smoking not approved, but flower may be vaporized; may possess 30-day supply                                                                                                                                                                                                                                         |

| U.S. Territories:     |            |   |   |                                                   |  |  |                                                                                                             |                                                                                                    |
|-----------------------|------------|---|---|---------------------------------------------------|--|--|-------------------------------------------------------------------------------------------------------------|----------------------------------------------------------------------------------------------------|
| <b>Guam</b>           | Prohibited | ✓ |   | Proposal 14A (2014)                               |  |  |                                                                                                             |                                                                                                    |
| <b>Puerto Rico</b>    | Prohibited | ✓ |   | Public Health Department Regulation 155 (2016)    |  |  |                                                                                                             | <b>Product:</b> smoking not approved                                                               |
|                       |            |   |   |                                                   |  |  |                                                                                                             |                                                                                                    |
| <b>Alabama</b>        | Prohibited |   | ✓ | SB 174 (2014); HB 61 (2016)                       |  |  |                                                                                                             | <b>Product:</b> extracts below 3% THC                                                              |
| <b>Georgia</b>        | Prohibited |   | ✓ | HB 1 (2015); Georgia's Low-THC Oil Registry Guide |  |  | <b>General advertising:</b> Georgia does not allow dispensaries, nor advertising for their medical cannabis | <b>Product:</b> oils below 5% THC and at least equal amount of CBD                                 |
| <b>Idaho</b>          | Prohibited |   | ✓ | SB 1146 (Vetoed in 2015)                          |  |  |                                                                                                             | <b>Product:</b> no more than three-tenths (.3)% THC and at least 15 times CBD by weight            |
| <b>Indiana</b>        | Prohibited |   | ✓ | HB 1148 (2017)                                    |  |  |                                                                                                             | <b>Product:</b> no more than three-tenths (.3)% THC by weight and at least 5% CBD by weight        |
| <b>Iowa</b>           | Prohibited |   | ✓ | SF 2360, Medical Cannabidiol Act of 2014 (2014)   |  |  |                                                                                                             | <b>Product:</b> no more than 3% THC, essentially free from plant matter<br>Purchase limit: 32 oz.  |
| <b>Kansas</b>         | Prohibited |   | ✓ | SB 282                                            |  |  |                                                                                                             | <b>Product:</b> cannabis oil exempted from definition of "marijuana;" must have 0% THC             |
| <b>Kentucky</b>       | Prohibited |   | ✓ | SB 124 (2014)                                     |  |  |                                                                                                             | <b>Product:</b> only CBD oil (exempted from definition of cannabis)                                |
| <b>Mississippi</b>    | Prohibited |   | ✓ | HB 1231 (2014)                                    |  |  |                                                                                                             | <b>Product:</b> oil, extract, or resin with more than 15% CBD and no more than one-half (.5) % THC |
| <b>North Carolina</b> | Prohibited |   | ✓ | HB 1220 (2014); HB 766 (2015)                     |  |  |                                                                                                             | <b>Product:</b> "hemp extracts" equal to or                                                        |

|                       |            |  |   |                                            |  |  |  |  |                                                                                                                                                                                                 |
|-----------------------|------------|--|---|--------------------------------------------|--|--|--|--|-------------------------------------------------------------------------------------------------------------------------------------------------------------------------------------------------|
|                       |            |  |   |                                            |  |  |  |  | less than nine-tenth (.9)% THC and at least 5% CBD by weight                                                                                                                                    |
| <b>South Carolina</b> | Prohibited |  | ✓ | SB 1035 (2014)                             |  |  |  |  | <b>Product:</b> extracted from marijuana or synthesized in a laboratory; contains no more than nine-tenths (0.9)% THC and over 15% CBD or least 98 % CBD and not more than (.90)% THC by volume |
| <b>South Dakota</b>   | Prohibited |  | ✓ | Senate Bill 95 (2017)                      |  |  |  |  | <b>Product:</b> only FDA approved products (first and only cannabis derived product approved on 6.25.18)                                                                                        |
| <b>Tennessee</b>      | Prohibited |  | ✓ | SB 2531 (2014); HB 197 (2015)              |  |  |  |  | <b>Product:</b> "cannabis oil" with less than nine-tenth (.9)% THC as part of university clinical study                                                                                         |
| <b>Texas</b>          | Prohibited |  | ✓ | SB 339 (2015); Texas Compassionate-Use Act |  |  |  |  | <b>Product:</b> "low-THC cannabis;" no more than one-half (.5)% THC by weight and not less than 10% CBD by weight                                                                               |
| <b>Virginia</b>       | Prohibited |  | ✓ | HB 1445 (2015); HB 1251 (2018)             |  |  |  |  | <b>Purchase limit:</b> 90-day supply<br><b>Product:</b> cannabis oils with at least 15% CBD or THC-A and no more than 5% THC                                                                    |
| <b>Wisconsin</b>      | Prohibited |  | ✓ | AB 726 (2013 Act 267)                      |  |  |  |  | <b>Product:</b> "cannabidiol in a form without a psychoactive effect;" THC and/or CBD levels not defined                                                                                        |
| <b>Wyoming</b>        | Prohibited |  | ✓ | HB 32 (2015)                               |  |  |  |  | <b>Product:</b> "hemp extracts" with less                                                                                                                                                       |



|                 |            |            |  |  |  |  |  |  |                                                             |
|-----------------|------------|------------|--|--|--|--|--|--|-------------------------------------------------------------|
|                 |            |            |  |  |  |  |  |  | than three-tenths (0.3) % THC and at least 5% CBD by weight |
| <b>Nebraska</b> | Prohibited | Prohibited |  |  |  |  |  |  |                                                             |

\*General accessibility reflects laws which place relatively few restrictions on access to cannabis product for medical use.

\*\*Limited accessibility reflects laws which limit medical cannabis products, such as requiring products to have low THC/CBD ratios, or allowing medical cannabis to patients with severe diseases (e.g., intractable seizure disorders).

Definitions derived from National Conference of State Legislature 2018
